# Supplementary material
Source: publisher figshare collection journal article supplement (https://asha.figshare.com/articles/dataset/_/15032583)
Supplement: Supplementary file 1 [file 1]

**Supplemental Material S2.** Pairwise contrasts for significant interactions of Channel × Emotion × Decoders' Gender (Model 13) and Channel × Emotion × Encoders' Gender (Model 14) in accuracy.

| <b>Contrast</b>                              | <b>Estimate</b> | <b>SE</b> | <b>Test (df)</b> | <b>Cohen's <i>d</i> [95% CI]</b> |
|----------------------------------------------|-----------------|-----------|------------------|----------------------------------|
| <b>Channel × Emotion × Decoders' gender</b>  |                 |           |                  |                                  |
| Angry, facial (female vs. male decoders)     | .415            | 2.58      | .16 (1438)       | .03 [-.29, .34]                  |
| Angry, prosodic (female vs. male decoders)   | 2.10            | 2.58      | .81 (1438)       | .13 [-.18, .44]                  |
| Angry, semantic (female vs. male decoders)   | 6.65            | 2.58      | 2.58 (1438)*     | .41 [.10, .72]                   |
| Happy, facial (female vs. male decoders)     | .13             | 2.58      | .05 (1438)       | .01 [-.30, .32]                  |
| Happy, prosodic (female vs. male decoders)   | 8.03            | 2.58      | 3.11 (1438)**    | .49 [.18, .81]                   |
| Happy, semantic (female vs. male decoders)   | 3.98            | 2.58      | 1.54 (1438)      | .24 [-.07, .56]                  |
| Neutral, facial (female vs. male decoders)   | 1.03            | 2.58      | .40 (1438)       | .06 [-.25, .38]                  |
| Neutral, prosodic (female vs. male decoders) | -3.75           | 2.58      | -1.45 (1438)     | -.23 [-.54, .08]                 |
| Neutral, semantic (female vs. male decoders) | 1.61            | 2.58      | .62 (1438)       | .10 [-.21, .41]                  |
| Sad, facial (female vs. male decoders)       | 6.13            | 2.58      | 2.38 (1438)*     | .38 [.07, .69]                   |
| Sad, prosodic (female vs. male decoders)     | 6.01            | 2.58      | 2.33 (1438)*     | .37 [.06, .68]                   |
| Sad, semantic (female vs. male decoders)     | .72             | 2.58      | .28 (1438)       | .04 [-.27, .36]                  |
| <b>Channel × Emotion × Encoders' gender</b>  |                 |           |                  |                                  |
| Angry, facial (female vs. male encoders)     | -2.84           | 2.39      | -1.19 (1984)     | -.17 [-.47, .12]                 |
| Angry, prosodic (female vs. male encoders)   | -3.67           | 2.39      | -1.53 (1984)     | -.23 [-.53, .06]                 |
| Angry, semantic (female vs. male encoders)   | 3.78            | 2.39      | 1.58 (1984)      | .23 [-.06, .53]                  |
| Happy, facial (female vs. male encoders)     | 6.67            | 2.39      | 2.79 (1984)**    | .42 [.12, .72]                   |
| Happy, prosodic (female vs. male encoders)   | 12.66           | 2.39      | 5.29 (1984)***   | .80 [.50, 1.09]                  |
| Happy, semantic (female vs. male encoders)   | -22.19          | 2.39      | -9.28 (1984)***  | -1.40 [-1.69, -1.10]             |
| Neutral, facial (female vs. male encoders)   | -1.84           | 2.39      | -.76 (1984)      | -.12 [-.41, .18]                 |
| Neutral, prosodic (female vs. male encoders) | 6.23            | 2.39      | 2.60 (1984)**    | .39 [.10, .69]                   |
| Neutral, semantic (female vs. male encoders) | .17             | 2.39      | .07 (1984)       | .01 [-.28, .31]                  |
| Sad, facial (female vs. male encoders)       | 6.70            | 2.39      | 2.80 (1984)**    | .42 [-.13, .72]                  |
| Sad, prosodic (female vs. male encoders)     | 9.92            | 2.39      | 4.15 (1984)***   | .62 [.33, .92]                   |
| Sad, semantic (female vs. male decoders)     | -2.58           | 2.39      | -1.08 (1984)     | -.16 [-.46, .13]                 |

*Note.* *df* = degree of freedom; *SE* = standard error; CI = confidence intervals. Female decoders and encoders were set as default level when compared with their male counterparts. \*  $p < .05$ ; \*\*  $p < .01$ ; \*\*\*  $p < .001$ .
