# Supplementary material
Source: publisher figshare collection journal article supplement (https://asha.figshare.com/articles/dataset/_/15032583)
Supplement: Supplementary file 2 [file 1]

**Supplemental Material S1.** Selected words for the prosodic and semantic task and their familiarity level.

| Task &<br>Emotion   | Prosodic task     |                     | Semantic task       |                     |                      |
|---------------------|-------------------|---------------------|---------------------|---------------------|----------------------|
|                     | Neutral           | Angry               | Happy               | Neutral             | Sad                  |
| Words               | 咖啡<br>(coffee)    | 发怒<br>(angry)       | 兴奋<br>(excited)     | 平常<br>(usual)       | 悲哀<br>(mournful)     |
|                     | 蜻蜓<br>(dragonfly) | 痛恨<br>(resentful)   | 开心<br>(happy)       | 平凡<br>(ordinary)    | 伤心<br>(sad)          |
|                     | 斑马<br>(zebra)     | 大怒<br>(wrathful)    | 悠闲<br>(leisure)     | 日常<br>(daily)       | 压抑<br>(repressed)    |
|                     | 风扇<br>(fan)       | 残暴<br>(cruel)       | 愉快<br>(pleased)     | 普通<br>(plain)       | 失落<br>(downcast)     |
|                     | 台灯<br>(lamp)      | 凶狠<br>(malevolent)  | 喜悦<br>(delightful)  | 一般<br>(common)      | 悲苦<br>(sorrowful)    |
|                     | 河流<br>(river)     | 生气<br>(angry)       | 欢乐<br>(joyful)      | 通俗<br>(popular)     | 悲痛<br>(sorrowful)    |
|                     | 毛毯<br>(blanket)   | 气愤<br>(irritated)   | 欢快<br>(cheerful)    | 平淡<br>(plain)       | 苦闷<br>(doleful)      |
|                     | 肥皂<br>(soap)      | 恼火<br>(exasperated) | 满意<br>(contented)   | 通常<br>(general)     | 沮丧<br>(upset)        |
|                     | 水杯<br>(cup)       | 恼怒<br>(annoyed)     | 安康<br>(sound)       | 适度<br>(appropriate) | 哀愁<br>(grieved)      |
|                     | 火柴<br>(match)     | 狂怒<br>(furious)     | 安宁<br>(peaceful)    | 适中<br>(moderate)    | 凄凉<br>(dismal)       |
|                     | 粉笔<br>(chalk)     | 愤懑<br>(sulky)       | 欢喜<br>(delighted)   | 平时<br>(normal)      | 沉痛<br>(heavyhearted) |
|                     | 手套<br>(glove)     | 怨恨<br>(resented)    | 融洽<br>(harmonious)  | 平均<br>(average)     | 绝望<br>(desperate)    |
|                     | 面包<br>(bread)     | 暴怒<br>(outraged)    | 有趣<br>(interesting) | 平等<br>(equal)       | 心痛<br>(heart-broken) |
|                     | 树林<br>(woods)     | 暴躁<br>(irritable)   | 舒畅<br>(carefree)    | 平缓<br>(mild)        | 阴暗<br>(gloomy)       |
|                     | 报纸<br>(newspaper) | 愤恨<br>(spiteful)    | 高兴<br>(glad)        | 固定<br>(fix)         | 苦涩<br>(bitter)       |
|                     | 大象<br>(elephant)  | 愤怒<br>(indignant)   | 快乐<br>(merry)       | 均衡<br>(balanced)    | 郁闷<br>(depressed)    |
| <b>Familiarity:</b> |                   |                     |                     |                     |                      |
| <b>Mean (SD)</b>    |                   |                     |                     |                     |                      |
|                     | 4.94 (0.35)       | 4.56 (.40)          | 4.99 (.46)          | 4.99 (.25)          | 4.69 (.44)           |

*Note.* Participants rated the familiarity of the words on a 7-point scale (0 = not familiar, 6 = very familiar).
