# Supplementary material
Source: publisher figshare collection journal article supplement (https://asha.figshare.com/articles/dataset/_/15032583)
Supplement: Supplementary file 3 [file 1]

**Supplemental Material S3.** Pairwise contrasts for the significant interaction of Channel × Emotion × Decoders' Gender × Encoders' Gender (Model 15) in reaction time.

| Contrast                                                       | Estimate | SE  | Test (df)        | Cohen's <i>d</i> [95% CI] |
|----------------------------------------------------------------|----------|-----|------------------|---------------------------|
| <b>Channel × Emotion × Decoders' Gender × Encoders' Gender</b> |          |     |                  |                           |
| Angry, facial, female decoders (female vs. male encoders)      | .09      | .03 | 3.29 (15513)**   | .25 [.10, .41]            |
| Angry, facial, male decoders (female vs. male encoders)        | .18      | .03 | 6.72 (15513)***  | .52 [.37, .67]            |
| Angry, prosodic, female decoders (female vs. male encoders)    | .06      | .03 | 2.42 (15513)*    | .19 [.03, .34]            |
| Angry, prosodic, male decoders (female vs. male encoders)      | .08      | .03 | 3.28 (15513)**   | .25 [.10, .40]            |
| Angry, semantic, female decoders (female vs. male encoders)    | -.11     | .03 | -4.16 (15514)*** | -.33 [-.48, -.17]         |
| Angry, semantic, male decoders (female vs. male encoders)      | -.11     | .03 | -4.27 (15514)*** | -.34 [-.49, -.18]         |
| Happy, facial, female decoders (female vs. male encoders)      | -.15     | .03 | -5.86 (15513)*** | -.46 [-.60, -.30]         |
| Happy, facial, male decoders (female vs. male encoders)        | -.09     | .03 | -3.43 (15513)*** | -.26 [-.40, -.11]         |
| Happy, prosodic, female decoders (female vs. male encoders)    | -.19     | .03 | -6.92 (15514)*** | -.56 [-.72, -.40]         |
| Happy, prosodic, male decoders (female vs. male encoders)      | -.11     | .03 | -4.05 (15514)*** | -.33 [-.49, -.17]         |
| Happy, semantic, female decoders (female vs. male encoders)    | .10      | .03 | 3.49 (15514)***  | .28 [.12, .44]            |
| Happy, semantic, male decoders (female vs. male encoders)      | .09      | .03 | 3.36 (15514)***  | .27 [.11, .43]            |
| Neutral, facial, female decoders (female vs. male encoders)    | .02      | .03 | .95 (15513)      | .07 [-.09, .22]           |
| Neutral, facial, male decoders (female vs. male encoders)      | -.03     | .03 | -1.14 (15513)    | -.09 [-.24, .06]          |
| Neutral, prosodic, female decoders (female vs. male encoders)  | -.14     | .03 | -5.37 (15513)*** | -.42 [-.58, -.27]         |
| Neutral, prosodic, male decoders (female vs. male encoders)    | -.09     | .03 | -3.49 (15513)*** | -.27 [-.42, -.12]         |
| Neutral, semantic, female decoders (female vs. male encoders)  | -.003    | .03 | -.11 (15513)     | -.01 [-.16, .14]          |
| Neutral, semantic, male decoders (female vs. male encoders)    | .04      | .03 | 1.39 (15513)     | .11 [-.04, .26]           |
| Sad, facial, female decoders (female vs. male encoders)        | -.01     | .03 | -.44(15513)      | -.04 [-.19, .12]          |
| Sad, facial, male decoders (female vs. male encoders)          | -.06     | .03 | -2.35 (15513)*   | -.19 [-.34, -.03]         |
| Sad, prosodic, female decoders (female vs. male encoders)      | -.05     | .03 | -1.92 (15513)    | -.15 [-.31, .004]         |
| Sad, prosodic, male decoders (female vs. male encoders)        | -.05     | .03 | -1.97 (15514)*   | -.15 [-.31, .0003]        |
| Sad, semantic, female decoders (female vs. male encoders)      | .07      | .03 | 2.74 (15513)**   | .22 [.06, .38]            |
| Sad, semantic, male decoders (female vs. male encoders)        | .14      | .03 | 5.22 (15514)***  | .41 [.25, .57]            |

*Note.* *df* = degree of freedom; *SE* = standard error; CI = confidence intervals. Female decoders and encoders were set as default level when compared with their male counterparts. \**p* < .05; \*\**p* < .01; \*\*\**p* < .001.
